# Supplementary material for: Exploring Climate‐Disease Connections in Geopolitical Versus Ecological Regions: The Case of West Nile Virus in the United States
Source: PubMed Central journal article supplement — Geohealth. 2024 Jun 21;8(6):e2024GH001024. doi: 10.1029/2024GH001024 (PMC11190782; doi:10.1029/2024gh001024), 2024-06-21
Supplement: GH2-8-e2024GH001024-s001.pdf [file GH2-8-e2024GH001024-s001.pdf]

## SUPPLEMENTARY INFORMATION

### Exploring climate-disease connections in geopolitical versus ecological regions: the case of West Nile virus in the United States

S. Kane Moser<sup>1,2</sup>, Julie A. Spencer<sup>3</sup>, Martha Barnard<sup>3,4</sup>, James M. Hyman<sup>5</sup>, Carrie A. Manore<sup>6</sup>, and Morgan E. Gorris<sup>3\*</sup>

<sup>1</sup>*Genomics and Bioanalytics, Los Alamos National Laboratory, Los Alamos, NM, USA*

<sup>2</sup>*Odum School of Ecology, University of Georgia, Athens, GA, USA*

<sup>3</sup>*Information Systems and Modeling, Los Alamos National Laboratory, Los Alamos, NM, USA*

<sup>4</sup>*Division of Biostatistics, University of Minnesota, Minneapolis, MN, USA*

<sup>5</sup>*Tulane University, New Orleans, LA, USA*

<sup>6</sup>*Theoretical Biology and Biophysics, Los Alamos National Laboratory, Los Alamos, NM, USA*

*\*Corresponding author email: mgorris@lanl.gov*

## TABLE OF CONTENTS

### TABLES

**Table S1.** Heterogeneity of politically bounded regions: comparison of land overlap and characteristics between NOAA climate regions and EPA ecoregions.....**pg. 3-4**

**Table S2.** Total WNND cases from 2005-2019; mean annual WNND incidence averaged from 2005-2019 (cases per 100,000 population per year); average population rounded to the nearest 1,000 averaged from 2005-2019; maximum, minimum, and mean surface air temperatures (°C) averaged from 2005-2019; and precipitation (mm/year) averaged from 2005-2019 for NOAA climate regions (a) and EPA ecoregions (b).  
.....**pg. 5**

**Table S3.** Spearman’s rank correlation coefficients between annual climate drivers and WNND incidence from 2005-2019 for NOAA climate regions (a) and EPA ecoregions (b).....**pg. 6**

**Table S4.** Tables enabling comparison of Spearman’s rank correlations between annual climate drivers and WNND incidence from 2005-2019 for NOAA climate regions and their overlapping EPA ecoregions, partitioned into sub-tables (a-i) for each NOAA climate region.....**pg. 7-11**

### FIGURES

**Figure S1.** Comparison of total land area (km<sup>2</sup>) in NOAA climate regions (a) and EPA ecoregions (b).....**pg. 12**

**Figure S2.** Map of mean annual WNND incidence (cases per 100,000 population per year) from 2005-2019 by US county. While the geographical distribution of high incidence counties is widespread, there is a general “V” shape of higher incidence stretching throughout the central US from the Canadian border to west-central Texas.....**pg. 13**

**Figure S3.** Time series of yearly WNND case incidence (cases per 100,000 population), maximum annual temperature (°C), mean annual temperature (°C), minimum annual temperature (°C), and mean annual precipitation (mm/year) in NOAA climate regions (a) and EPA ecoregions (b).....**pg. 14**

**Figure S4.** Mean annual WNND incidence (2005-2019) for NOAA climate regions (a) and EPA ecoregions (b) as both size and darkness of plotted circles. Mean annual temperature in degrees Celsius is represented on the y-axis and mean annual precipitation in millimeters per year is represented on the x-axis. Ecoregions with lower mean annual precipitation and moderate mean annual temperatures have the greatest WNND, whereas NOAA regions do not exhibit a clear pattern.....**pg. 15**

**Table S1.** Heterogeneity of politically bounded regions: comparison of land overlap and characteristics between NOAA climate regions and EPA ecoregions

| <b>NOAA climate region</b> | <b>EPA ecoregions encompassed</b> | <b>Ecoregion characteristics</b>                                |
|----------------------------|-----------------------------------|-----------------------------------------------------------------|
| Ohio Valley                | Eastern Temperate Forests         | moderate precipitation, warm, humid, temperate                  |
|                            | Great Plains                      | varied precipitation, extreme temperatures, high winds          |
| Southeast                  | Eastern Temperate Forests         | moderate precipitation, warm, humid, temperate                  |
|                            | Tropical Wet Forests              | high precipitation, mild temperatures year-round, low elevation |
| Northeast                  | Eastern Temperate Forests         | moderate precipitation, warm, humid, temperate                  |
|                            | Northern Forests                  | varied precipitation; long, cold winters; short, warm summers   |
| South                      | Eastern Temperate Forests         | moderate precipitation, warm, humid, temperate                  |
|                            | Great Plains                      | varied precipitation, extreme temperatures, high winds          |
|                            | North American Deserts            | arid to semi-arid, seasonal temperature extremes                |

**Table S1, Continued.** Heterogeneity of politically bounded regions: comparison of land overlap and characteristics between NOAA climate regions and EPA ecoregions

| <b>NOAA climate region</b>  | <b>EPA ecoregions encompassed</b> | <b>Ecoregion characteristics</b>                              |
|-----------------------------|-----------------------------------|---------------------------------------------------------------|
| Upper Midwest               | Eastern Temperate Forests         | moderate precipitation, warm, humid, temperate                |
|                             | Northern Forests                  | varied precipitation; long, cold winters; short, warm summers |
|                             | Great Plains                      | varied precipitation, extreme temperatures, high winds        |
| Northern Rockies and Plains | Great Plains                      | varied precipitation, extreme temperatures, high winds        |
|                             | North American Deserts            | arid to semi-arid, seasonal temperature extremes              |
|                             | Northwestern Forested Mountains   | varied precipitation and temperatures; varied elevation       |
| Southwest                   | Great Plains                      | varied precipitation, extreme temperatures, high winds        |
|                             | North American Deserts            | arid to semi-arid, seasonal temperature extremes              |
|                             | Northwestern Forested Mountains   | moderate precipitation, warm, humid, temperate                |
|                             | Southern Semiarid Highlands       | semi-arid, high elevation                                     |
|                             | Temperate Sierras                 | mountainous, varied                                           |
| Northwest                   | North American Deserts            | varied precipitation, extreme temperatures, high winds        |
|                             | Northwestern Forested Mountains   | moderate precipitation, warm, humid, temperate                |
|                             | Marine West Coast Forest          | varied precipitation; long, cold winters; short, warm summers |
| West                        | North American Deserts            | varied precipitation, extreme temperatures, high winds        |
|                             | Northwestern Forested Mountains   | arid to semi-arid, seasonal temperature extremes              |
|                             | Marine West Coast Forest          | varied precipitation and temperatures; varied elevation       |
|                             | Mediterranean California          | hot, dry summers; mild winters; variable precipitation        |

**Table S2.** Total WNND cases from 2005-2019; mean annual WNND incidence averaged from 2005-2019 (cases per 100,000 population per year); average population rounded to the nearest 1,000 averaged from 2005-2019; maximum, minimum, and mean surface air temperatures (°C) averaged from 2005-2019; and precipitation (mm/year) averaged from 2005-2019 for NOAA climate regions (a) and EPA ecoregions (b)

| <b>a) NOAA climate regions</b>         | <b>Total cases</b> | <b>Mean annual incidence</b> | <b>Population</b> | <b>Maximum temperature</b> | <b>Minimum temperature</b> | <b>Mean temperature</b> | <b>Precipitation</b> |
|----------------------------------------|--------------------|------------------------------|-------------------|----------------------------|----------------------------|-------------------------|----------------------|
| <b>Northeast</b>                       | 1,350              | 0.14                         | 62,276,000        | 13.9                       | 3.1                        | 8.5                     | 1232                 |
| <b>Northern Rockies and Plains</b>     | 1,425              | 1.92                         | 4,961,000         | 13.3                       | -0.2                       | 6.5                     | 537                  |
| <b>Northwest</b>                       | 348                | 0.19                         | 12,445,000        | 14.1                       | 1.7                        | 7.9                     | 859                  |
| <b>Ohio Valley</b>                     | 2,166              | 0.29                         | 49,532,000        | 18.2                       | 6.6                        | 12.4                    | 1204                 |
| <b>South</b>                           | 4,743              | 0.74                         | 43,176,000        | 23.9                       | 10.5                       | 17.2                    | 954                  |
| <b>Southeast</b>                       | 806                | 0.09                         | 56,745,000        | 23.6                       | 11.5                       | 17.5                    | 1325                 |
| <b>Southwest</b>                       | 2,145              | 0.86                         | 16,693,000        | 19.5                       | 3.8                        | 11.6                    | 374                  |
| <b>Upper Midwest</b>                   | 1,172              | 0.32                         | 24,117,000        | 12.4                       | 1.2                        | 6.8                     | 869                  |
| <b>West</b>                            | 3,977              | 0.65                         | 40,616,000        | 20.2                       | 5.7                        | 12.9                    | 445                  |
| <b>b) EPA ecoregions</b>               | <b>Total cases</b> | <b>Mean annual incidence</b> | <b>Population</b> | <b>Maximum temperature</b> | <b>Minimum temperature</b> | <b>Mean temperature</b> | <b>Precipitation</b> |
| <b>North American Deserts</b>          | 2,674              | 0.86                         | 20,872,000        | 18.8                       | 3.9                        | 11.4                    | 314                  |
| <b>Mediterranean California</b>        | 3,175              | 0.68                         | 31,086,000        | 22.2                       | 8.4                        | 15.3                    | 513                  |
| <b>Southern Semiarid Highlands</b>     | 18                 | 0.57                         | 212,000           | 24.9                       | 8.2                        | 16.6                    | 360                  |
| <b>Temperate Sierras</b>               | 15                 | 0.32                         | 310,000           | 21.9                       | 5.4                        | 13.6                    | 399                  |
| <b>Tropical Wet Forests</b>            | 7                  | 0.01                         | 6,174,000         | 29.1                       | 19.5                       | 24.3                    | 1388                 |
| <b>Northern Forests</b>                | 81                 | 0.08                         | 6,686,000         | 11.2                       | -0.1                       | 5.6                     | 985                  |
| <b>Northwestern Forested Mountains</b> | 418                | 0.26                         | 10,849,000        | 13.0                       | 0.3                        | 6.7                     | 841                  |
| <b>Marine West Coast Forest</b>        | 15                 | 0.02                         | 4,645,000         | 15.9                       | 5.8                        | 10.8                    | 1874                 |
| <b>Eastern Temperate Forests</b>       | 6,860              | 0.24                         | 187,400,000       | 19.7                       | 8.1                        | 13.9                    | 1247                 |
| <b>Great Plains</b>                    | 4,921              | 0.77                         | 42,960,000        | 17.9                       | 4.3                        | 11.1                    | 653                  |

**Table S3.** Spearman’s rank correlation coefficients between annual climate drivers and WNND incidence from 2005-2019 for NOAA climate regions (a) and EPA ecoregions (b)

| a) NOAA climate regions         | Maximum temperature |                | Minimum temperature |                | Mean temperature |                | Precipitation |                |
|---------------------------------|---------------------|----------------|---------------------|----------------|------------------|----------------|---------------|----------------|
|                                 | r                   | R <sup>2</sup> | r                   | R <sup>2</sup> | r                | R <sup>2</sup> | r             | R <sup>2</sup> |
| Northeast                       | 0.48*               | 0.23*          | 0.45*               | 0.20*          | 0.50*            | 0.25*          | -0.07         | 0.01           |
| Northern Rockies and Plains     | 0.35                | 0.13           | 0.37                | 0.14           | 0.39             | 0.15           | -0.36         | 0.13           |
| Northwest                       | 0.32                | 0.11           | 0.09                | 0.01           | 0.20             | 0.04           | -0.11         | 0.01           |
| Ohio Valley                     | 0.51*               | 0.26*          | 0.49*               | 0.24*          | 0.50*            | 0.25*          | -0.52**       | 0.27**         |
| South                           | 0.22                | 0.05           | 0.31                | 0.09           | 0.28             | 0.08           | -0.21         | 0.04           |
| Southeast                       | 0.41                | 0.17           | 0.56**              | 0.31**         | 0.51*            | 0.26*          | 0.03          | 0.00           |
| Southwest                       | 0.15                | 0.02           | 0.24                | 0.06           | 0.07             | 0.00           | 0.30          | 0.09           |
| Upper Midwest                   | 0.68**              | 0.46**         | 0.70**              | 0.49**         | 0.68**           | 0.47**         | -0.24         | 0.06           |
| West                            | 0.64**              | 0.41**         | 0.72**              | 0.52**         | 0.72**           | 0.52**         | -0.05         | 0.00           |
| b) EPA ecoregions               | Maximum temperature |                | Minimum temperature |                | Mean temperature |                | Precipitation |                |
|                                 | r                   | R <sup>2</sup> | r                   | R <sup>2</sup> | r                | R <sup>2</sup> | r             | R <sup>2</sup> |
| North American Deserts          | 0.23                | 0.05           | 0.24                | 0.06           | 0.22             | 0.05           | 0.28          | 0.08           |
| Mediterranean California        | 0.75**              | 0.57**         | 0.74**              | 0.54**         | 0.80**           | 0.63**         | -0.10         | 0.01           |
| Southern Semiarid Highlands     | -0.33               | 0.11           | -0.29               | 0.08           | -0.37            | 0.14           | 0.04          | 0.00           |
| Temperate Sierras               | -0.57**             | 0.32**         | -0.35               | 0.13           | -0.52**          | 0.27**         | 0.61**        | 0.38**         |
| Tropical Wet Forests            | -0.16               | 0.03           | -0.66**             | 0.44**         | -0.51*           | 0.26*          | -0.50*        | 0.25*          |
| Northern Forests                | 0.32                | 0.10           | 0.44                | 0.19           | 0.36             | 0.13           | 0.05          | 0.00           |
| Northwestern Forested Mountains | 0.49*               | 0.24*          | 0.24                | 0.06           | 0.33             | 0.11           | -0.25         | 0.06           |
| Marine West Coast Forest        | 0.28                | 0.08           | 0.23                | 0.05           | 0.20             | 0.04           | 0.01          | 0.00           |
| Eastern Temperate Forests       | 0.58**              | 0.34**         | 0.60**              | 0.36**         | 0.55**           | 0.31**         | -0.28         | 0.08           |
| Great Plains                    | 0.36                | 0.13           | 0.41                | 0.17           | 0.46*            | 0.22*          | -0.19         | 0.04           |

Note: \*p<0.1, \*\*p<0.05

**Table S4.** Tables enabling comparison of Spearman’s rank correlations between annual climate drivers and WNND incidence from 2005-2019 for NOAA climate regions and their overlapping EPA ecoregions, partitioned into sub-tables (a-i) for each NOAA climate region

**Note:** \*p<0.1, \*\*p<0.05

**a. Northeast NOAA region and overlapping EPA ecoregions**

|                            |                                  | Maximum temperature |                | Minimum temperature |                | Mean temperature |                | Precipitation |                |
|----------------------------|----------------------------------|---------------------|----------------|---------------------|----------------|------------------|----------------|---------------|----------------|
|                            |                                  | r                   | R <sup>2</sup> | r                   | R <sup>2</sup> | r                | R <sup>2</sup> | r             | R <sup>2</sup> |
| <b>NOAA climate region</b> | <b>Northeast</b>                 | 0.48*               | 0.23*          | 0.45*               | 0.20*          | 0.50*            | 0.25*          | -0.07         | 0.01           |
| <b>EPA ecoregions</b>      | <b>Northern Forests</b>          | 0.32                | 0.10           | 0.44                | 0.19           | 0.36             | 0.13           | 0.05          | 0.00           |
|                            | <b>Eastern Temperate Forests</b> | 0.58**              | 0.34**         | 0.60**              | 0.36**         | 0.55**           | 0.31**         | -0.28         | 0.08           |

**b. Northern Rockies and Plains NOAA region and overlapping EPA ecoregions**

|                            |                                        | Maximum temperature |                | Minimum temperature |                | Mean temperature |                | Precipitation |                |
|----------------------------|----------------------------------------|---------------------|----------------|---------------------|----------------|------------------|----------------|---------------|----------------|
|                            |                                        | r                   | R <sup>2</sup> | r                   | R <sup>2</sup> | r                | R <sup>2</sup> | r             | R <sup>2</sup> |
| <b>NOAA climate region</b> | <b>Northern Rockies and Plains</b>     | 0.35                | 0.13           | 0.37                | 0.14           | 0.39             | 0.15           | -0.36         | 0.13           |
| <b>EPA ecoregions</b>      | <b>Great Plains</b>                    | 0.36                | 0.13           | 0.41                | 0.17           | 0.46*            | 0.22*          | -0.19         | 0.04           |
|                            | <b>North American Deserts</b>          | 0.23                | 0.05           | 0.24                | 0.06           | 0.22             | 0.05           | 0.28          | 0.08           |
|                            | <b>Northwestern Forested Mountains</b> | 0.49*               | 0.24*          | 0.24                | 0.06           | 0.33             | 0.11           | -0.25         | 0.06           |

**c. Northwest NOAA region and overlapping EPA ecoregions**

|                            |                                        | Maximum temperature |                | Minimum temperature |                | Mean temperature |                | Precipitation |                |
|----------------------------|----------------------------------------|---------------------|----------------|---------------------|----------------|------------------|----------------|---------------|----------------|
|                            |                                        | r                   | R <sup>2</sup> | r                   | R <sup>2</sup> | r                | R <sup>2</sup> | r             | R <sup>2</sup> |
| <b>NOAA climate region</b> | <b>Northwest</b>                       | 0.32                | 0.11           | 0.09                | 0.01           | 0.20             | 0.04           | -0.11         | 0.01           |
|                            | <b>North American Deserts</b>          | 0.23                | 0.05           | 0.24                | 0.06           | 0.22             | 0.05           | 0.28          | 0.08           |
| <b>EPA ecoregions</b>      | <b>Northwestern Forested Mountains</b> | 0.49*               | 0.24*          | 0.24                | 0.06           | 0.33             | 0.11           | -0.25         | 0.06           |
|                            | <b>Marine West Coast Forest</b>        | 0.28                | 0.08           | 0.23                | 0.05           | 0.20             | 0.04           | 0.01          | 0.00           |

**d. Ohio Valley NOAA region and overlapping EPA ecoregions**

|                            |                                  | Maximum temperature |                | Minimum temperature |                | Mean temperature |                | Precipitation |                |
|----------------------------|----------------------------------|---------------------|----------------|---------------------|----------------|------------------|----------------|---------------|----------------|
|                            |                                  | r                   | R <sup>2</sup> | r                   | R <sup>2</sup> | r                | R <sup>2</sup> | r             | R <sup>2</sup> |
| <b>NOAA climate region</b> | <b>Ohio Valley</b>               | 0.51*               | 0.26*          | 0.49*               | 0.24*          | 0.50*            | 0.25*          | -0.52**       | 0.27**         |
|                            | <b>Eastern Temperate Forests</b> | 0.58**              | 0.34**         | 0.60**              | 0.36**         | 0.55**           | 0.31**         | -0.28         | 0.08           |
| <b>EPA ecoregions</b>      | <b>Great Plains</b>              | 0.36                | 0.13           | 0.41                | 0.17           | 0.46*            | 0.22*          | -0.19         | 0.04           |



e. South NOAA region and overlapping EPA ecoregions

|                            |                                  | Maximum temperature |                | Minimum temperature |                | Mean temperature |                | Precipitation |                |
|----------------------------|----------------------------------|---------------------|----------------|---------------------|----------------|------------------|----------------|---------------|----------------|
|                            |                                  | r                   | R <sup>2</sup> | r                   | R <sup>2</sup> | r                | R <sup>2</sup> | r             | R <sup>2</sup> |
| <b>NOAA climate region</b> | <b>South</b>                     | 0.22                | 0.05           | 0.31                | 0.09           | 0.28             | 0.08           | -0.21         | 0.04           |
|                            | <b>Eastern Temperate Forests</b> | 0.58**              | 0.34**         | 0.60**              | 0.36**         | 0.55**           | 0.31**         | -0.28         | 0.08           |
| <b>EPA ecoregions</b>      | <b>Great Plains</b>              | 0.36                | 0.13           | 0.41                | 0.17           | 0.46*            | 0.22*          | -0.19         | 0.04           |
|                            | <b>North American Deserts</b>    | 0.23                | 0.05           | 0.24                | 0.06           | 0.22             | 0.05           | 0.28          | 0.08           |

f. Southeast NOAA region and overlapping EPA ecoregions

|                            |                                  | Maximum temperature |                | Minimum temperature |                | Mean temperature |                | Precipitation |                |
|----------------------------|----------------------------------|---------------------|----------------|---------------------|----------------|------------------|----------------|---------------|----------------|
|                            |                                  | r                   | R <sup>2</sup> | r                   | R <sup>2</sup> | r                | R <sup>2</sup> | r             | R <sup>2</sup> |
| <b>NOAA climate region</b> | <b>Southeast</b>                 | 0.41                | 0.17           | 0.56**              | 0.31**         | 0.51*            | 0.26*          | 0.03          | 0.00           |
|                            | <b>Eastern Temperate Forests</b> | 0.58**              | 0.34**         | 0.60**              | 0.36**         | 0.55**           | 0.31**         | -0.28         | 0.08           |
| <b>EPA ecoregions</b>      | <b>Tropical Wet Forests</b>      | -0.16               | 0.03           | -0.66**             | 0.44**         | -0.51*           | 0.26*          | -0.50*        | 0.25*          |

**g. Southwest NOAA region and overlapping EPA ecoregions**

|                            |                                        | Maximum temperature |                | Minimum temperature |                | Mean temperature |                | Precipitation |                |
|----------------------------|----------------------------------------|---------------------|----------------|---------------------|----------------|------------------|----------------|---------------|----------------|
|                            |                                        | r                   | R <sup>2</sup> | r                   | R <sup>2</sup> | r                | R <sup>2</sup> | r             | R <sup>2</sup> |
| <b>NOAA climate region</b> | <b>Southwest</b>                       | 0.15                | 0.02           | 0.24                | 0.06           | 0.07             | 0.00           | 0.30          | 0.09           |
|                            | <b>Great Plains</b>                    | 0.36                | 0.13           | 0.41                | 0.17           | 0.46*            | 0.22*          | -0.19         | 0.04           |
|                            | <b>North American Deserts</b>          | 0.23                | 0.05           | 0.24                | 0.06           | 0.22             | 0.05           | 0.28          | 0.08           |
| <b>EPA ecoregions</b>      | <b>Northwestern Forested Mountains</b> | 0.49*               | 0.24*          | 0.24                | 0.06           | 0.33             | 0.11           | -0.25         | 0.06           |
|                            | <b>Southern Semiarid Highlands</b>     | -0.33               | 0.11           | -0.29               | 0.08           | -0.37            | 0.14           | 0.04          | 0.00           |
|                            | <b>Temperate Sierras</b>               | -0.57**             | 0.32**         | -0.35               | 0.13           | -0.52**          | 0.27**         | 0.61**        | 0.38**         |

**h. Upper Midwest NOAA region and overlapping EPA ecoregions**

|                            |                                  | Maximum temperature |                | Minimum temperature |                | Mean temperature |                | Precipitation |                |
|----------------------------|----------------------------------|---------------------|----------------|---------------------|----------------|------------------|----------------|---------------|----------------|
|                            |                                  | r                   | R <sup>2</sup> | r                   | R <sup>2</sup> | r                | R <sup>2</sup> | r             | R <sup>2</sup> |
| <b>NOAA climate region</b> | <b>Upper Midwest</b>             | 0.68**              | 0.46**         | 0.70**              | 0.49**         | 0.68**           | 0.47**         | -0.24         | 0.06           |
|                            | <b>Eastern Temperate Forests</b> | 0.58**              | 0.34**         | 0.60**              | 0.36**         | 0.55**           | 0.31**         | -0.28         | 0.08           |
| <b>EPA ecoregions</b>      | <b>Northern Forests</b>          | 0.32                | 0.10           | 0.44                | 0.19           | 0.36             | 0.13           | 0.05          | 0.00           |
|                            | <b>Great Plains</b>              | 0.36                | 0.13           | 0.41                | 0.17           | 0.46*            | 0.22*          | -0.19         | 0.04           |

**i. West NOAA region and overlapping EPA ecoregions**

|                            |                                        | Maximum temperature |                | Minimum temperature |                | Mean temperature |                | Precipitation |                |
|----------------------------|----------------------------------------|---------------------|----------------|---------------------|----------------|------------------|----------------|---------------|----------------|
|                            |                                        | r                   | R <sup>2</sup> | r                   | R <sup>2</sup> | r                | R <sup>2</sup> | r             | R <sup>2</sup> |
| <b>NOAA climate region</b> | <b>West</b>                            | 0.64**              | 0.41**         | 0.72**              | 0.52**         | 0.72**           | 0.52**         | -0.05         | 0.00           |
|                            | <b>North American Deserts</b>          | 0.23                | 0.05           | 0.24                | 0.06           | 0.22             | 0.05           | 0.28          | 0.08           |
|                            | <b>Northwestern Forested Mountains</b> | 0.49*               | 0.24*          | 0.24                | 0.06           | 0.33             | 0.11           | -0.25         | 0.06           |
| <b>EPA ecoregions</b>      | <b>Marine West Coast Forest</b>        | 0.28                | 0.08           | 0.23                | 0.05           | 0.20             | 0.04           | 0.01          | 0.00           |
|                            | <b>Mediterranean California</b>        | 0.75**              | 0.57**         | 0.74**              | 0.54**         | 0.80**           | 0.63**         | -0.10         | 0.01           |

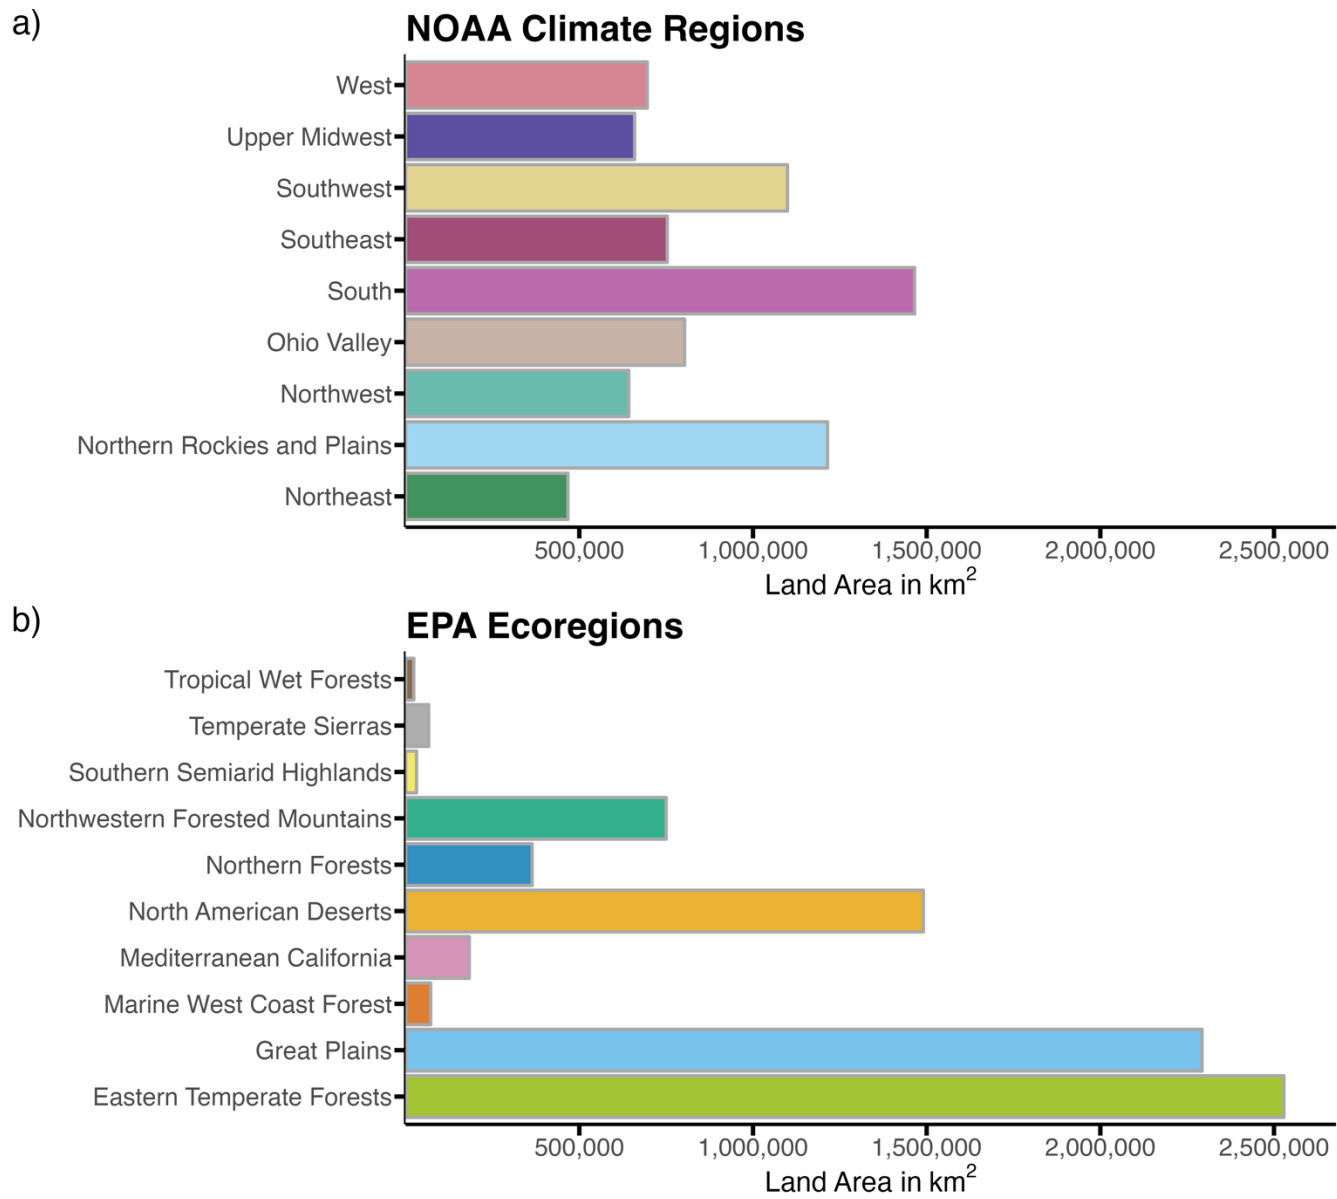

**Figure S1.** Comparison of total land area (km<sup>2</sup>) in NOAA climate regions (a) and EPA ecoregions (b).

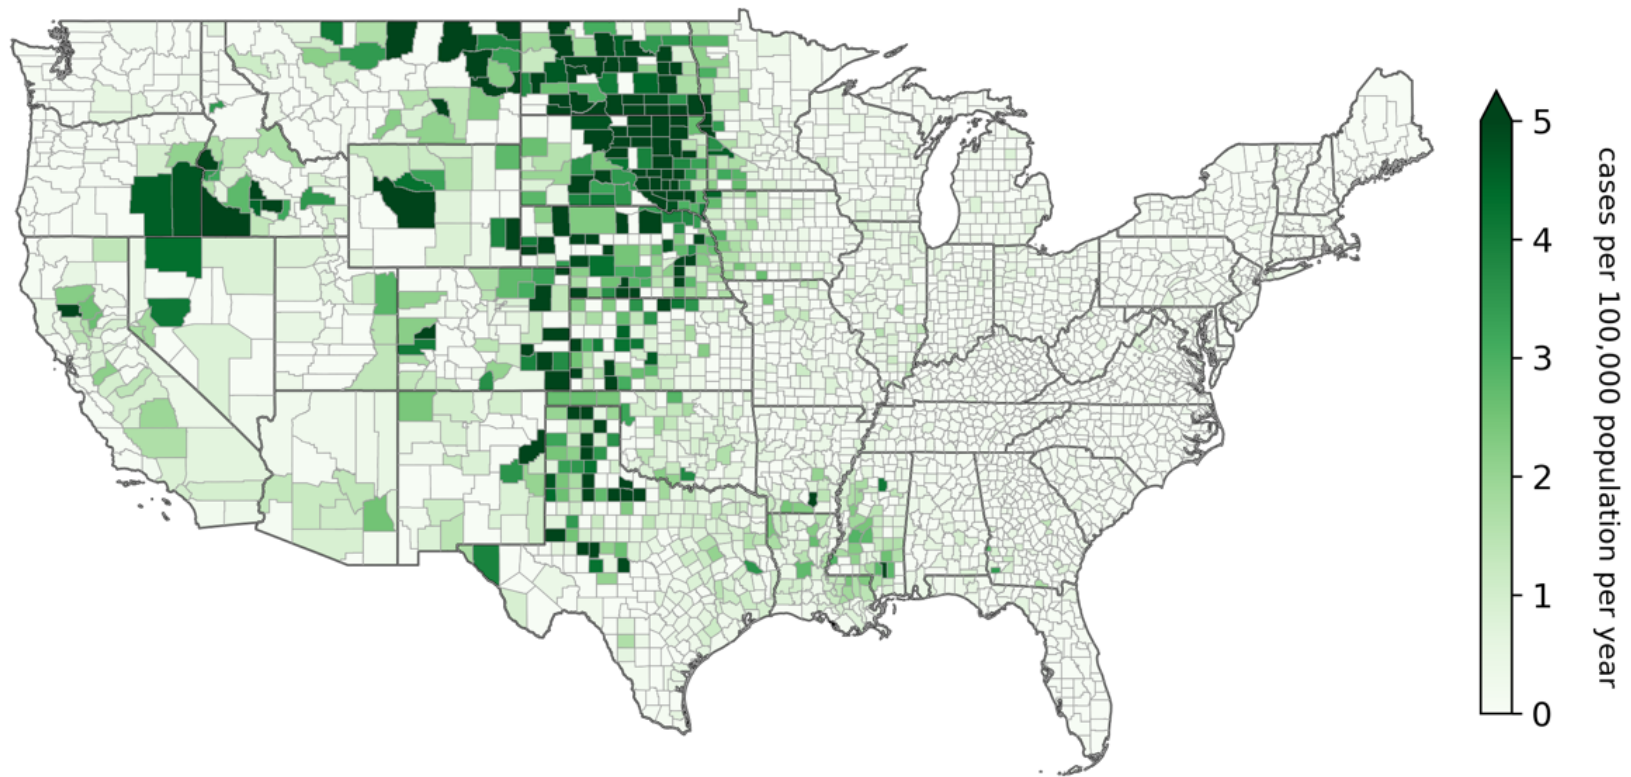

**Figure S2.** Map of mean annual WNND incidence (cases per 100,000 population per year) from 2005-2019 by US county. While the geographical distribution of high incidence counties is widespread, there is a general “V” shape of higher incidence stretching throughout the central US from the Canadian border to west-central Texas.

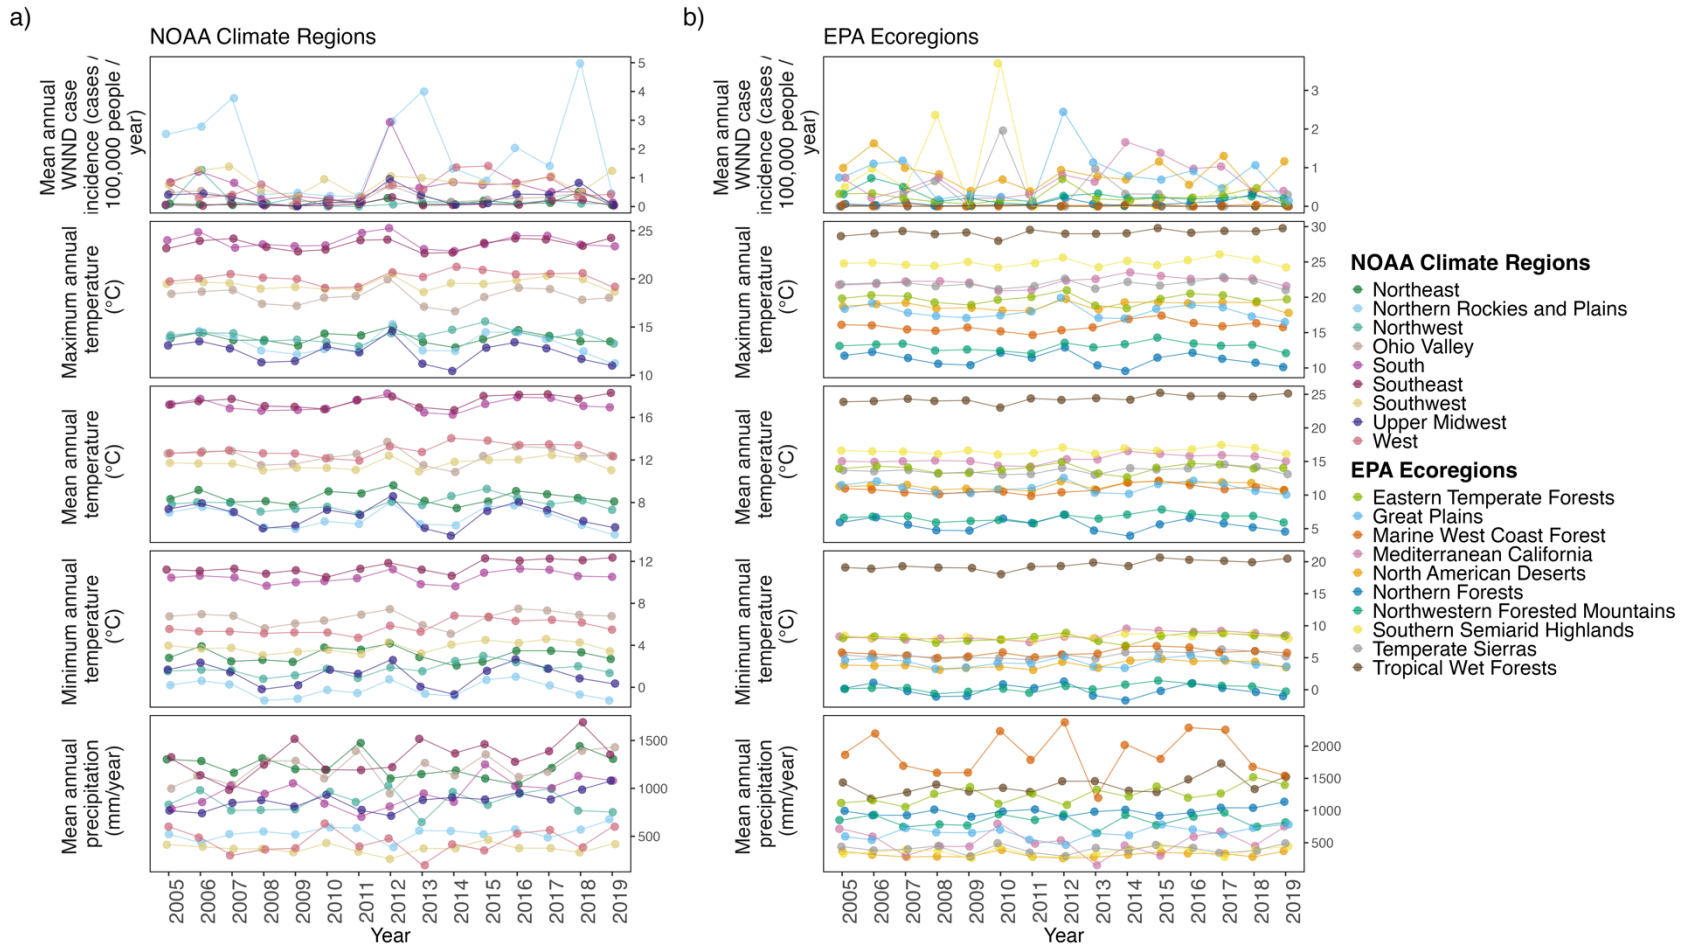

**Figure S3.** Time series of yearly WNNd case incidence (cases per 100,000 population), maximum annual temperature (°C), mean annual temperature (°C), minimum annual temperature (°C), and mean annual precipitation (mm/year) in NOAA climate regions (a) and EPA ecoregions (b).

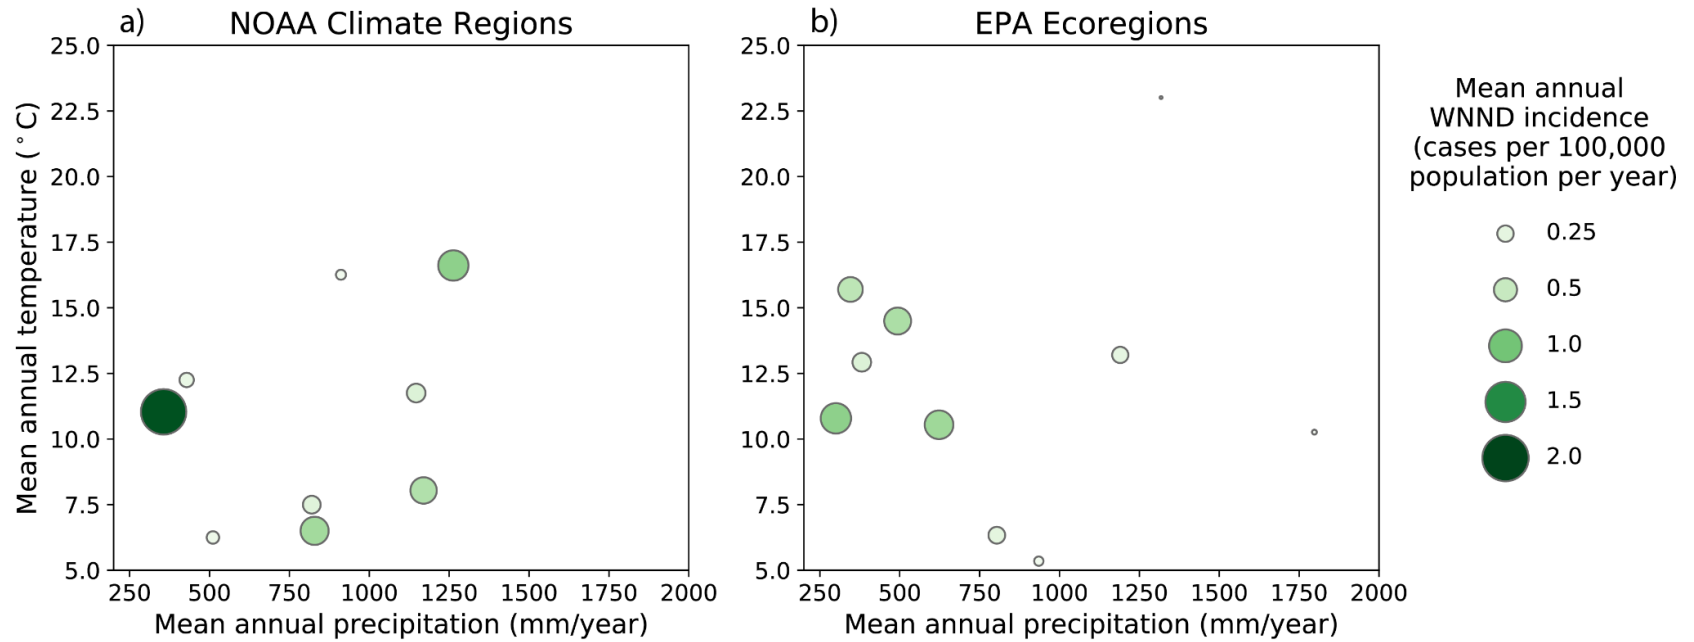

**Figure S4.** Mean annual WNND incidence (2005-2019) for NOAA climate regions (a) and EPA ecoregions (b) as both size and darkness of plotted circles. Mean annual temperature in degrees Celsius is represented on the y-axes and mean annual precipitation in millimeters per year is represented on the x-axes. Ecoregions with lower mean annual precipitation and moderate mean annual temperatures have the greatest WNND, whereas NOAA regions do not exhibit a clear pattern.
